# Supplementary material for: Imaging stressed organellesviasugar-conjugated color-switchable pH sensors
Source: Royal Society of Chemistry journal article supplement (doi:10.1039/c9an02441g), 2020-01-01
Supplement: c9an02441g1.pdf [file c9an02441g1.pdf]

Supporting Information

**Imaging Stressed Organelle via Sugar-conjugated Color-Switchable pH Sensors**

*Enkang Zhang,<sup>a</sup> Siyu Wang,<sup>a</sup> Xinhui Su,<sup>b,\*</sup> and Shoufa Han<sup>a,\*</sup>*

<sup>a</sup>Department of Chemical Biology, College of Chemistry and Chemical Engineering, State Key Laboratory for Physical Chemistry of Solid Surfaces, State key Laboratory of Cellular Stress Biology, The Key Laboratory for Chemical Biology of Fujian Province, and The MOE Key Laboratory of Spectrochemical Analysis & Instrumentation, Xiamen University, China;

<sup>b</sup>Department of Nuclear Medicine, Zhongshan Hospital, Xiamen University, China.

**Corresponding author**

\*To whom correspondence should be addressed. E-mail: [shoufa@xmu.edu.cn](mailto:shoufa@xmu.edu.cn),

[suxinhui@163.com](mailto:suxinhui@163.com).

Fax: +865922181728. Xiamen University.

## Contents

|                                                                                             |    |
|---------------------------------------------------------------------------------------------|----|
| Fig. S1 Acidity-independent retention of Sia-FR in lysosomes.....                           | 3  |
| Fig. S2 Acidity-independent retention of M6C-FR and Sia-FR in different cell line.<br>..... | 3  |
| Fig. S3 Cytotoxicity of M6C-FR and Sia-FR.....                                              | 4  |
| Fig. S5 <sup>1</sup> H NMR spectrum of <sup>Az</sup> M6C.....                               | 5  |
| Fig. S6 <sup>13</sup> C NMR spectrum of <sup>Az</sup> M6C.....                              | 5  |
| Fig. S7 <sup>1</sup> H NMR spectrum of S1.....                                              | 6  |
| Fig. S8 <sup>13</sup> C NMR spectrum of S1.....                                             | 6  |
| Fig. S9 <sup>1</sup> H NMR spectrum of S5.....                                              | 7  |
| Fig. S10 <sup>13</sup> C NMR spectrum of S5.....                                            | 7  |
| Fig. S11 <sup>1</sup> H NMR spectrum of S6.....                                             | 8  |
| Fig. S12 <sup>13</sup> C NMR spectrum of S6.....                                            | 8  |
| Fig. S13 <sup>1</sup> H NMR spectrum of S7.....                                             | 9  |
| Fig. S14 <sup>13</sup> C NMR spectrum of S7.....                                            | 9  |
| Fig. S15 HPLC and HRMS analysis of M6C-FR.....                                              | 10 |
| Fig. S16 HPLC and HRMS analysis of Sia-FR.....                                              | 10 |
| Fig. S17 FRET between fluorescein and rhodamine.....                                        | 11 |

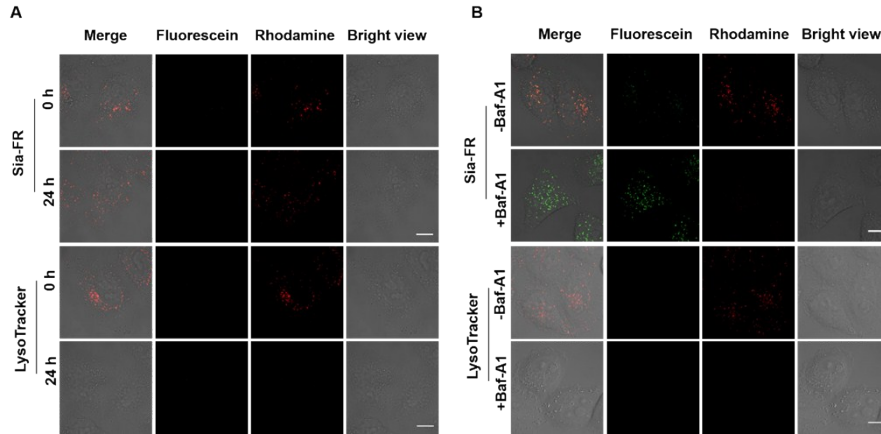

**Fig. S1** Acidity-independent retention of Sia-FR in lysosomes. (A) HeLa cells prestained with Sia-FR (20 μM) or LysoTracker Red (1 μM) were further incubated in fresh DMEM for 24 h before analysis. (B) HeLa cells prestained with Sia-FR (20 μM) or LysoTracker Red (1 μM) were further incubated in DMEM spiked with or without Baf-A1 (20 nM) for 24 h prior to confocal fluorescence microscopy analysis. Scale bars, 10 μm.

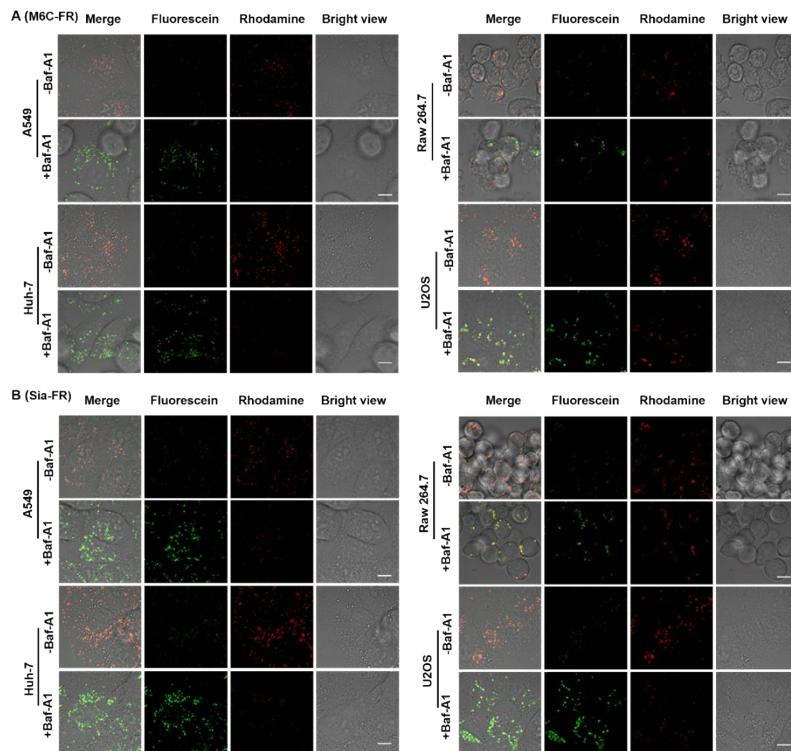

**Fig. S2** Acidity-independent retention of M6C-FR (A) and Sia-FR (B) in different cell lines. HeLa cells prestained with M6C-FR or Sia-FR (20 μM) were further incubated in DMEM spiked with or without Baf-A1 (20 nM) for 24 h prior to confocal fluorescence microscopy analysis. Scale bars, 10 μm.

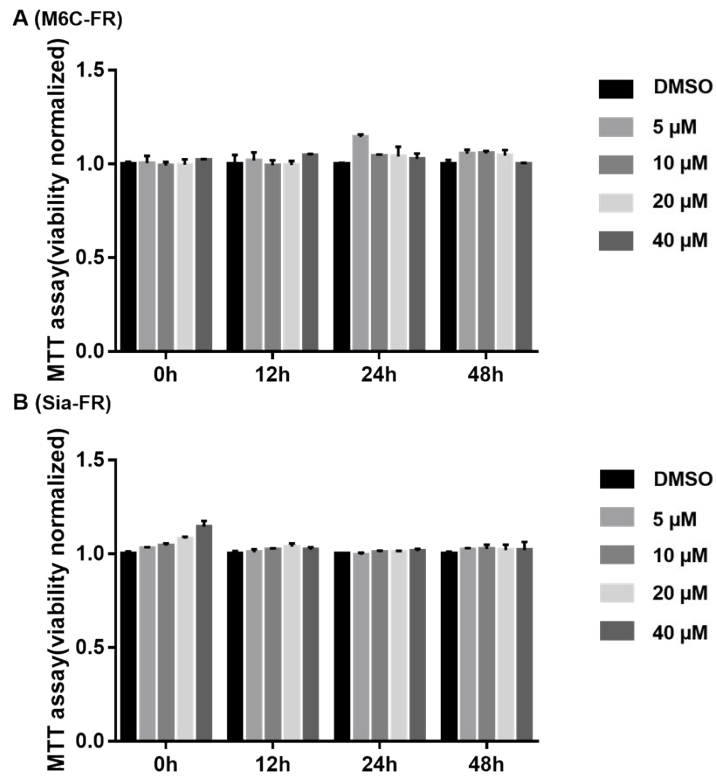

**Fig. S3** Cytotoxicity of M6C-FR and Sia-FR. HeLa cells prestained with M6C-FR (A) or Sia-FR (B) (0-40  $\mu$ M) for 0-48 h. At indicated time points, the cells were determined for cell viability by MTT assay.

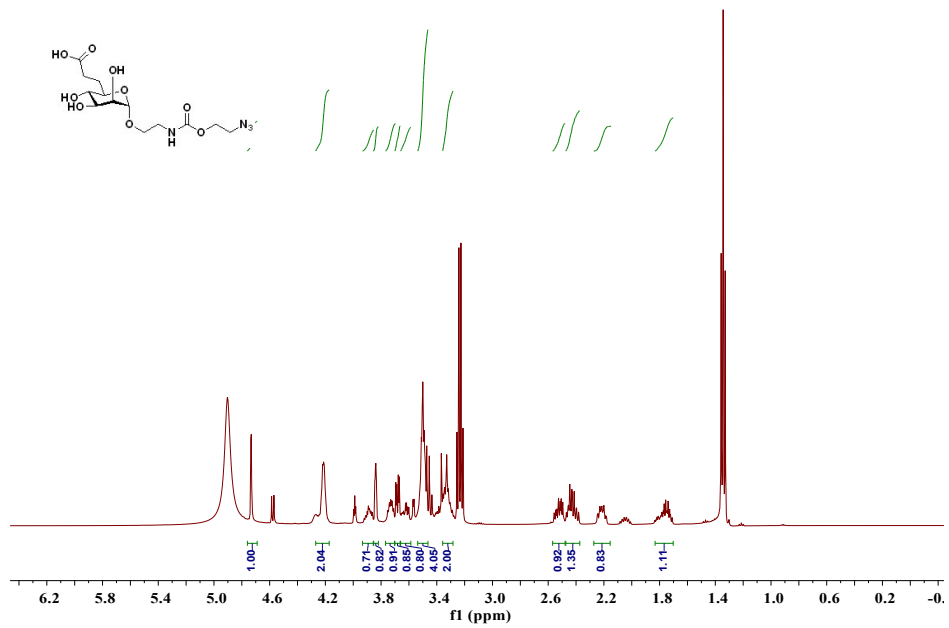

Fig. S5 <sup>1</sup>H NMR spectrum of AzM6C (CDCl<sub>3</sub>).

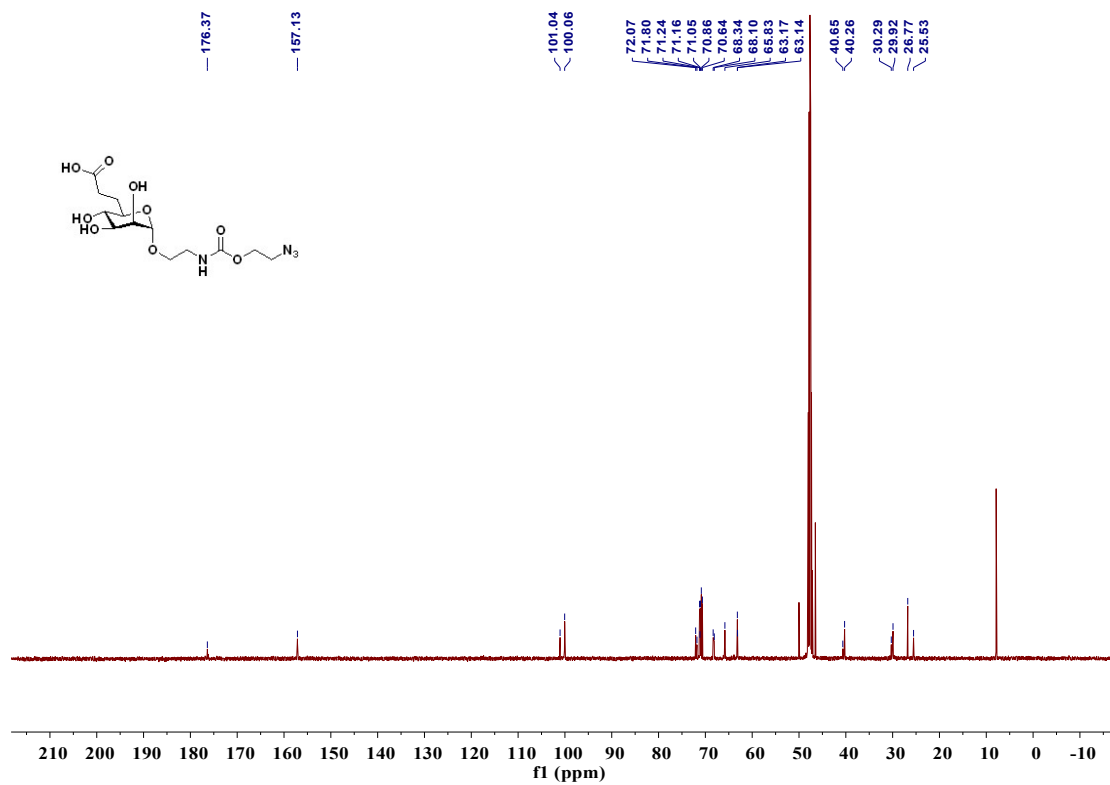

Fig. S6 <sup>13</sup>C NMR spectrum of AzM6C (CDCl<sub>3</sub>).

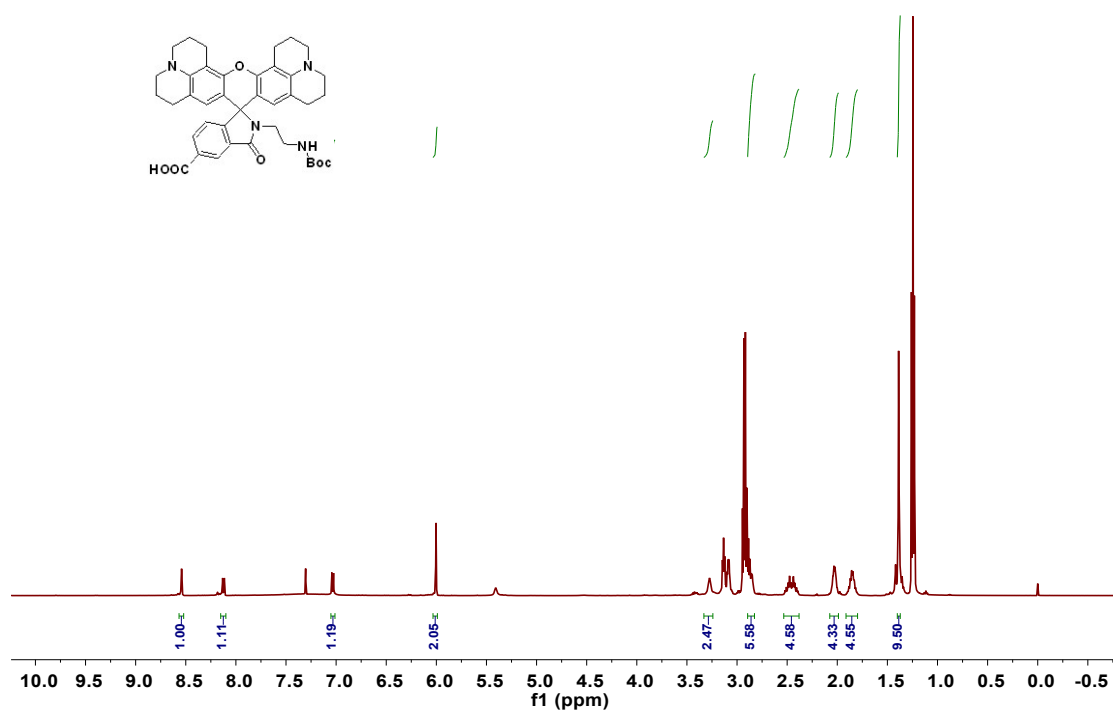

Fig. S7 <sup>1</sup>H NMR spectrum of S1 (CDCl<sub>3</sub>).

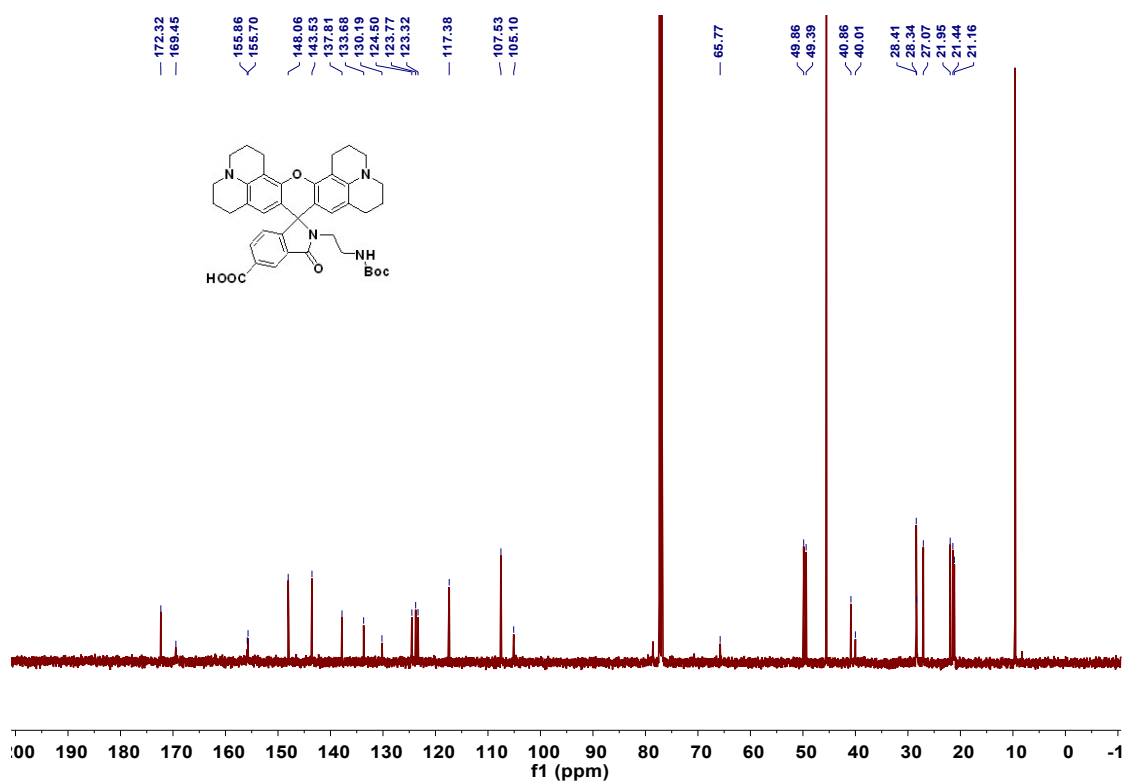

Fig. S8 <sup>13</sup>C NMR spectrum of S1 (CDCl<sub>3</sub>).

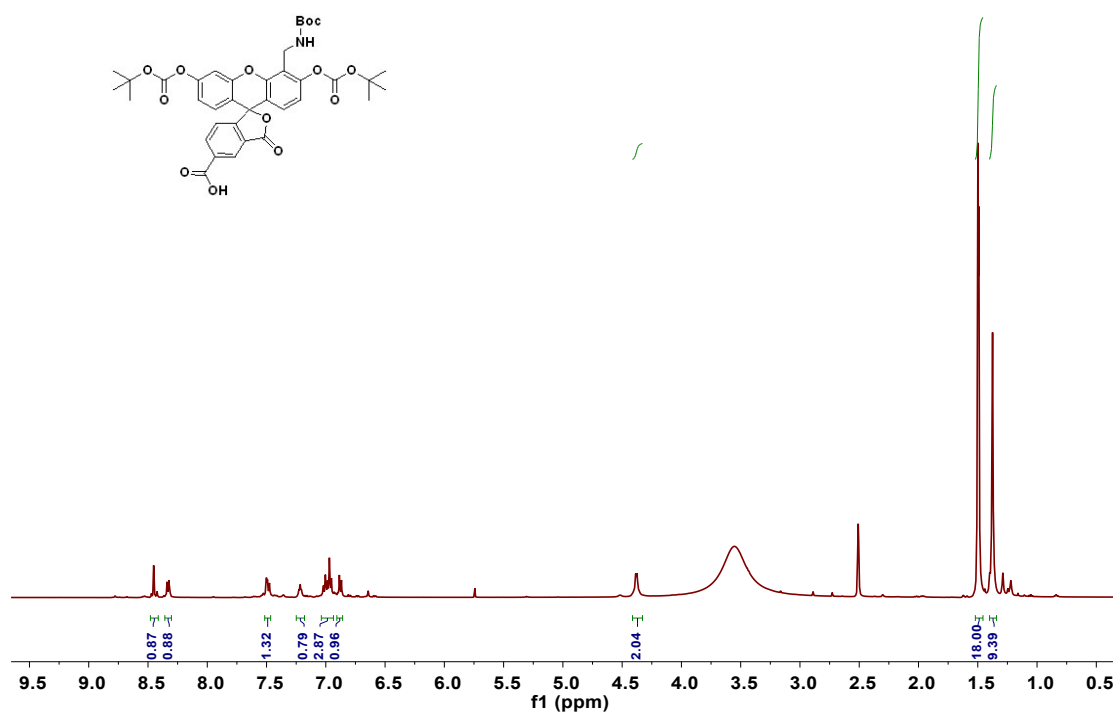

Fig. S9  $^1\text{H NMR}$  spectrum of S5 (DMSO- $d_6$ ).

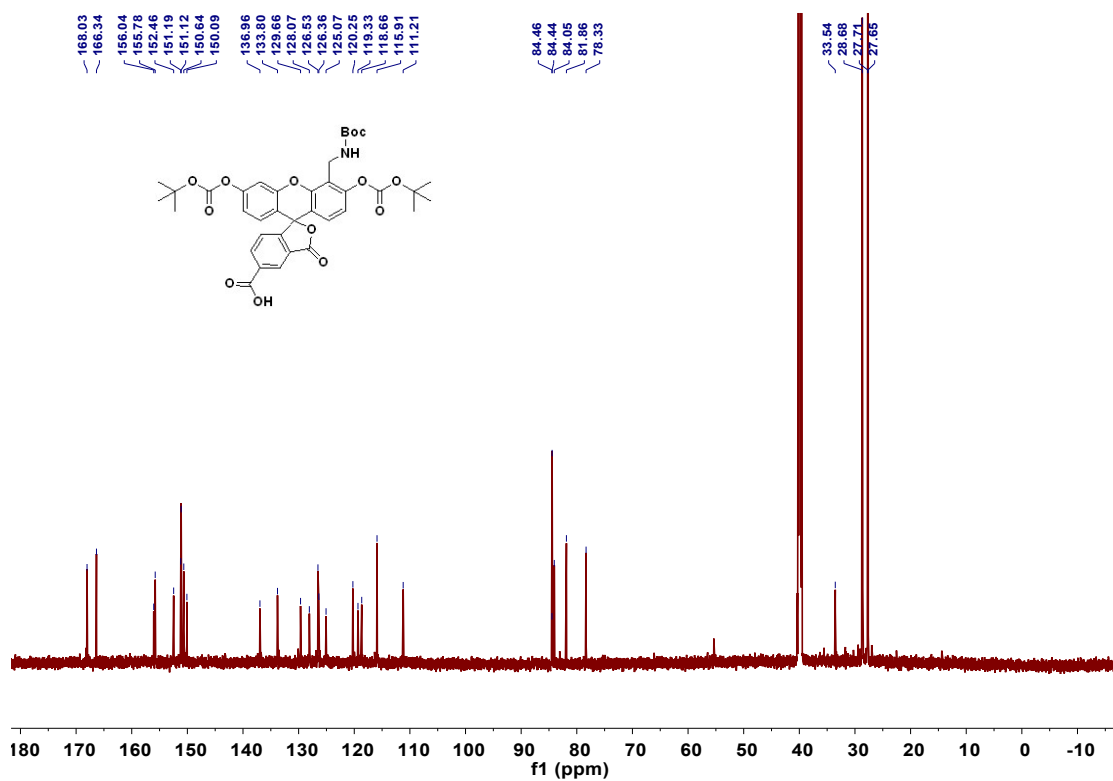

Fig. S10  $^{13}\text{C NMR}$  spectrum of S5 (DMSO- $d_6$ ).

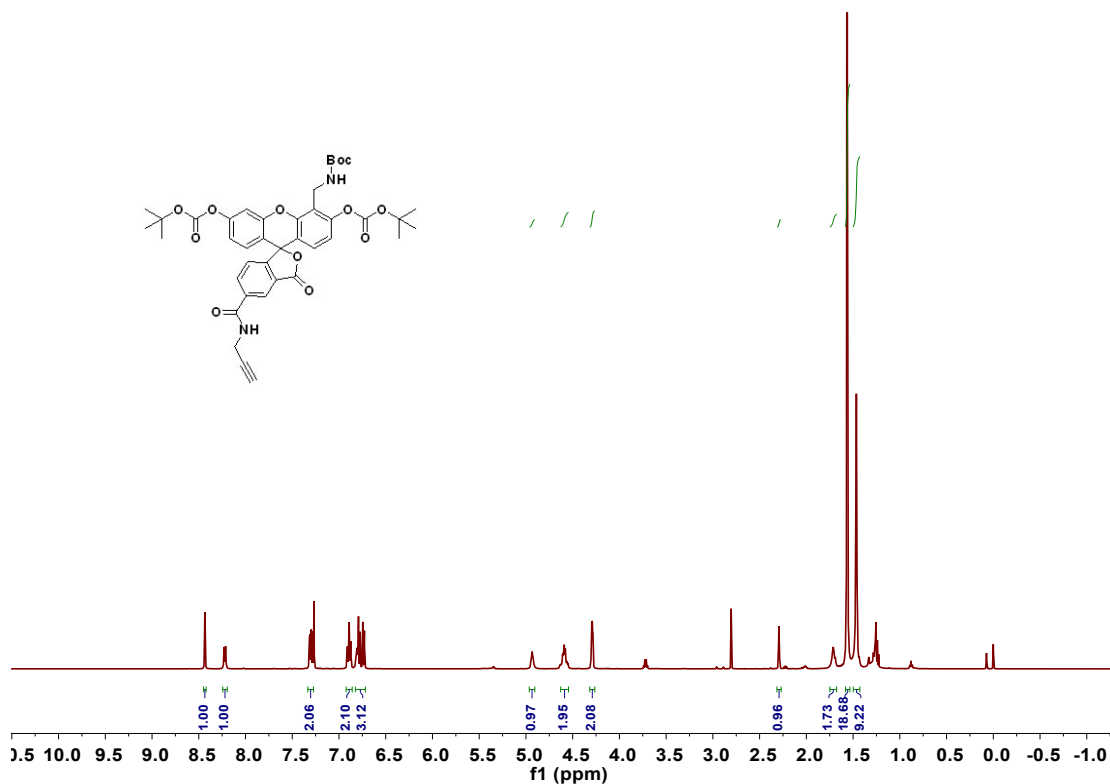

Fig. S11 <sup>1</sup>H NMR spectrum of S6 (CDCl<sub>3</sub>).

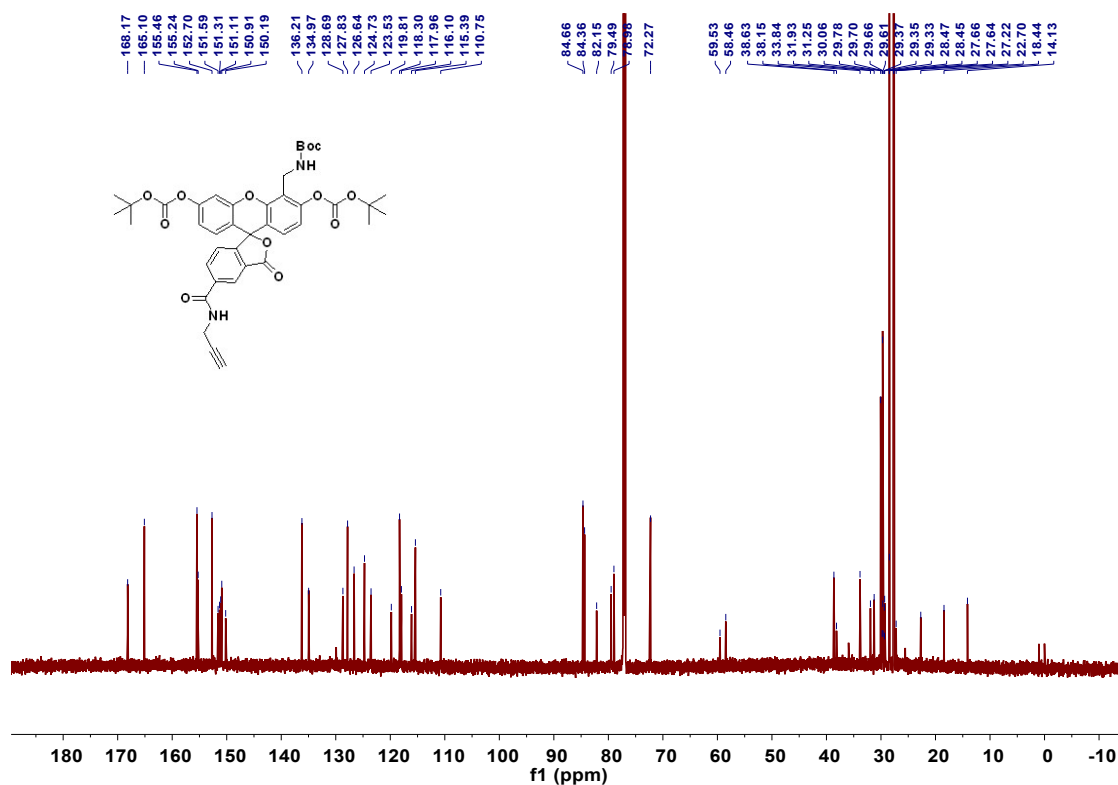

Fig. S12 <sup>13</sup>C NMR spectrum of S6 (CDCl<sub>3</sub>).



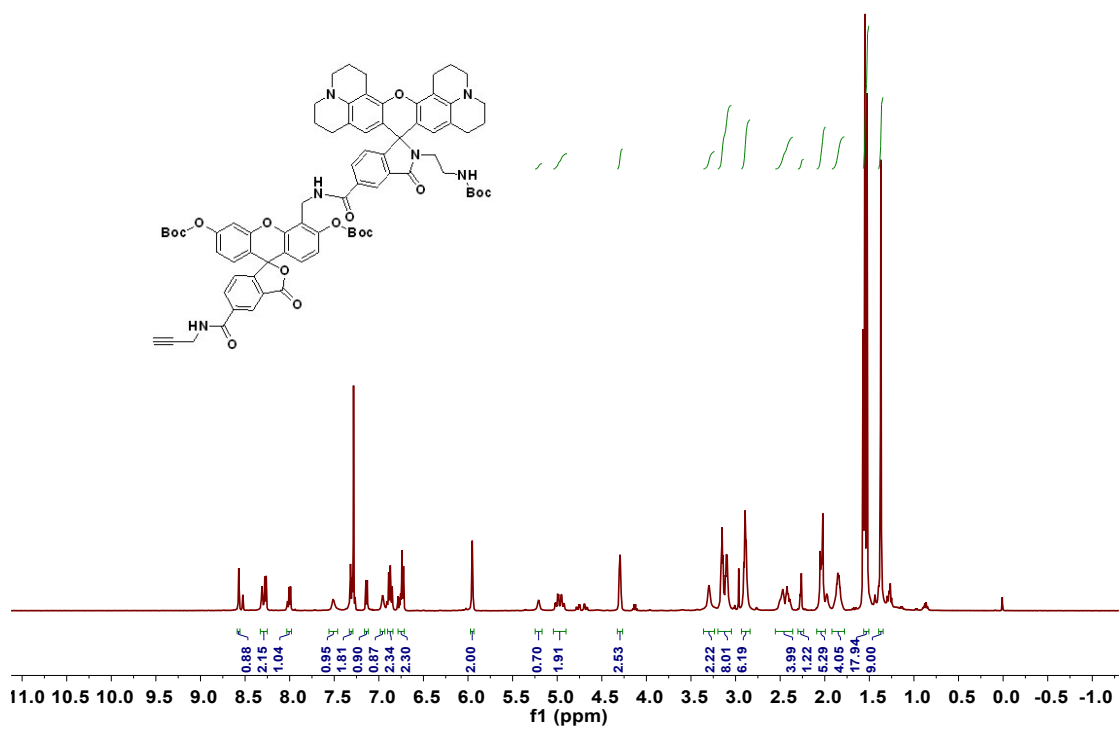

Fig. S13 <sup>1</sup>H NMR spectrum of S8 (CDCl<sub>3</sub>).

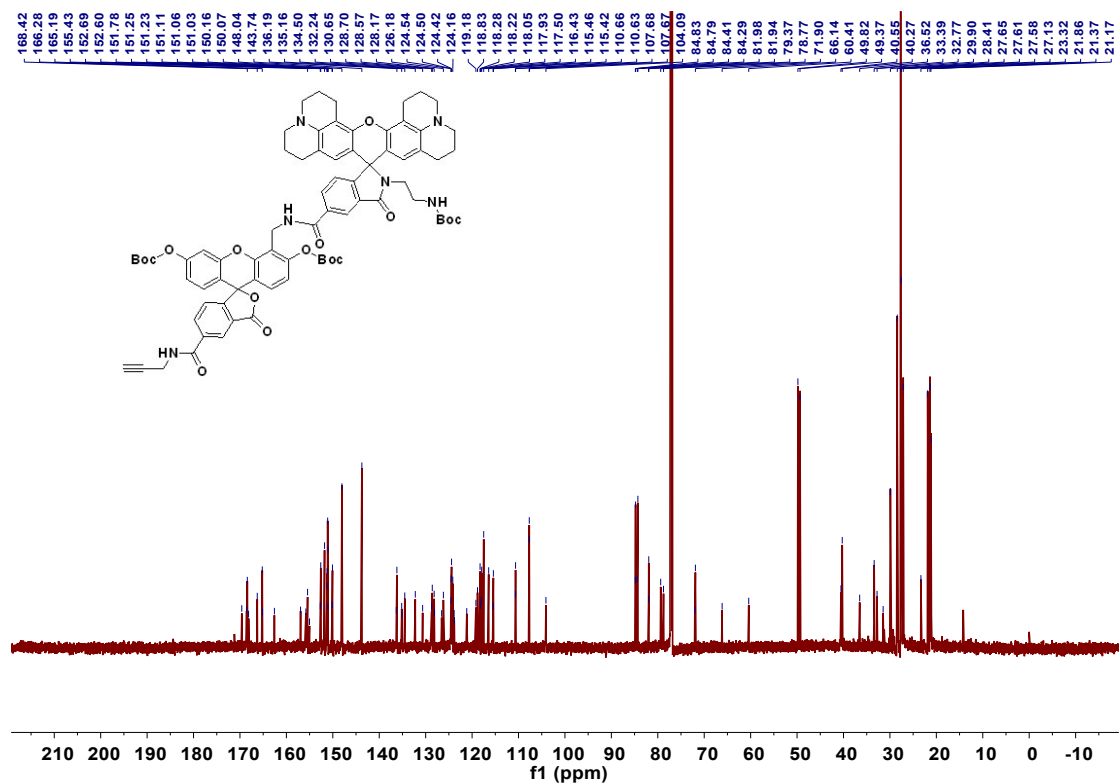

Fig. S14 <sup>13</sup>C NMR spectrum of S8 (CDCl<sub>3</sub>).

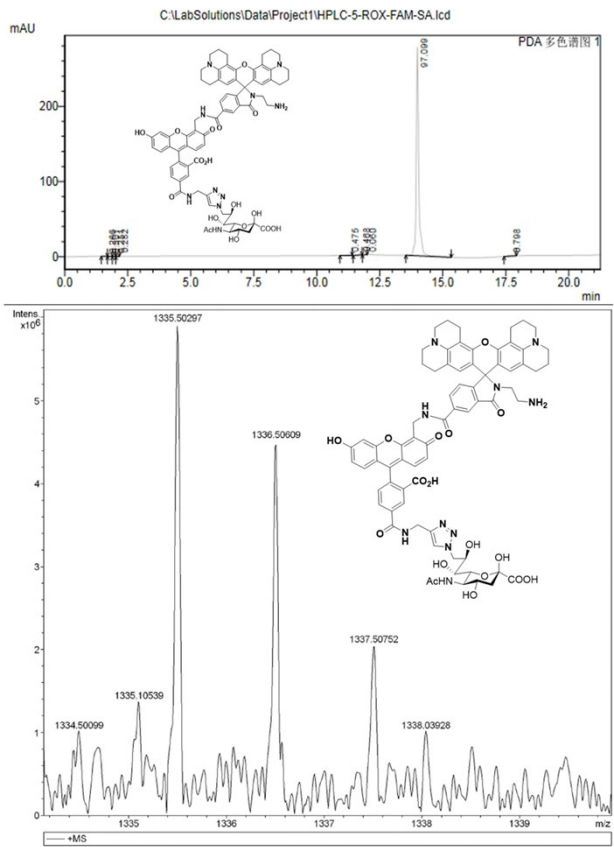

**Fig. S15** HPLC and HRMS analysis of M6C-FR.

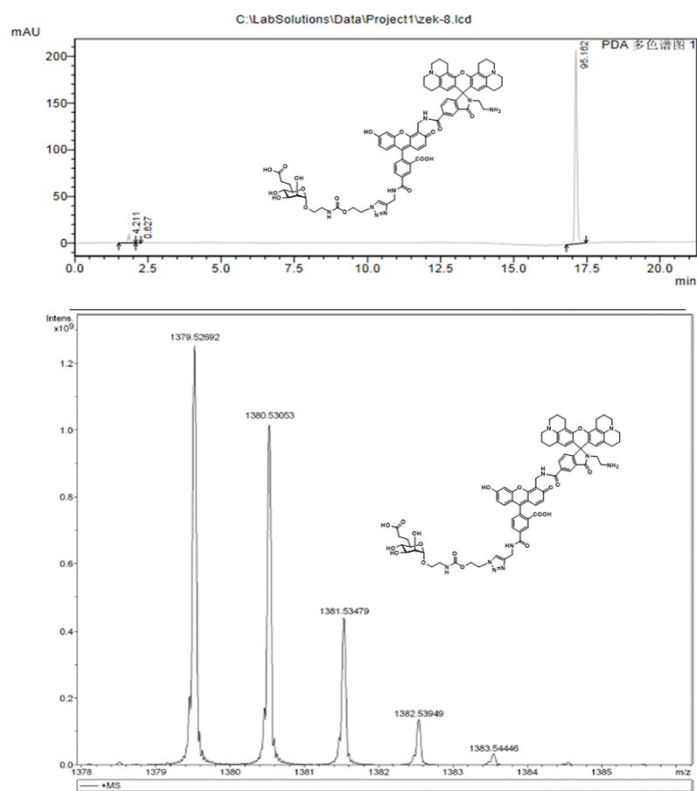

**Fig. S16** HPLC and HRMS analysis of Sia-FR.

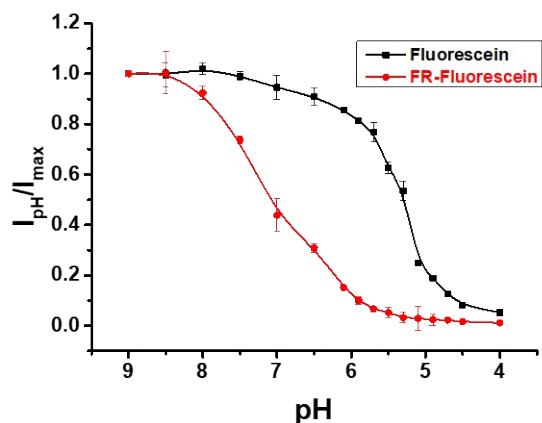

**Fig. S17** FRET between fluorescein and rhodamine. The green fluorescence emission at 515 nm of 5-FAM and M6C-FR and was determined as a function of buffer pH. The lower levels of fluorescence of fluorescein over M6C-FR at pH 9.0-6.5 is due to intramolecular effects of rhodamine-lactam on fluorescein moiety, because nonfluorescent rhodamine-lactam was present at neutral to alkaline pH. The assay also suggests insignificant FRET between fluorescein and rhodamine-amide moiety at pH 4.0-5.5.
